# Supplementary material for: Endoplasmic Reticulum Exit Sites scale with somato-dendritic size in neurons
Source: PubMed Central journal article supplement — Mol Biol Cell. 2023 Sep 21;34(11):ar106. doi: 10.1091/mbc.E23-03-0090 (PMC10559313; doi:10.1091/mbc.e23-03-0090), 2023-09-21
Supplement: mbc-34-ar106-s001.pdf [file mbc-34-ar106-s001.pdf]

Supplementary Materials

*Molecular Biology of the Cell*

Land *et al.*

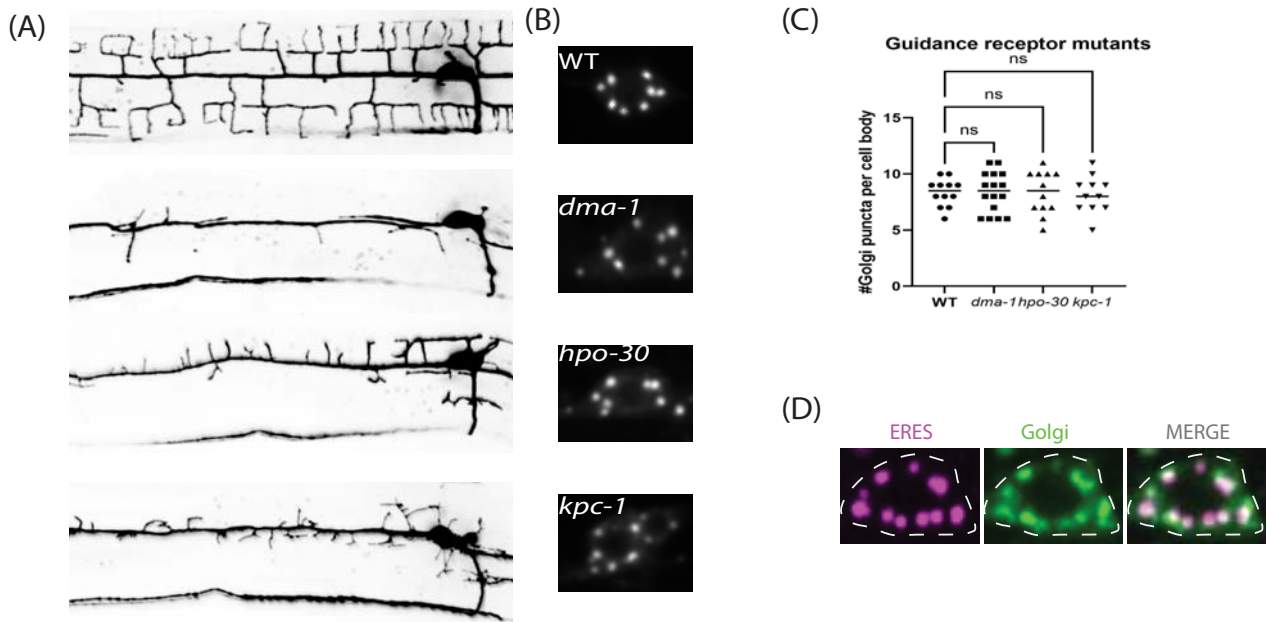

**Figure S1** (related to Fig. 2). Guidance receptor mutants do not impact the number of early secretory structures. (A) PVD dendrite morphology of wild type and indicated mutants. (B) AMAN-2::GFP overexpression shown in PVD soma. (C) Quantification of number of AMAN-2::GFP puncta in somas of wild type and indicated mutants. See methods Table S1 for allele names. (D) ERES marker SEC-23::TAG-RFP (left) in WT PVD soma, along with the Golgi marker, AMAN-2::GFP (middle).

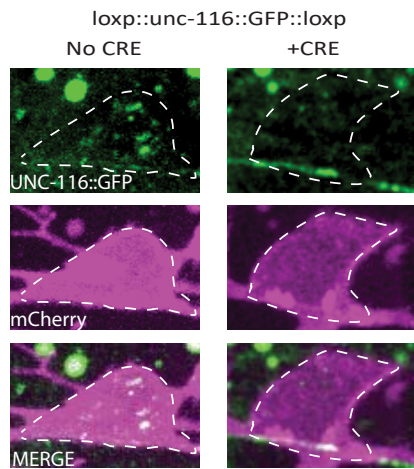

**Figure S2** (related to Fig. 5). The CRE line used in this study, wyls897, disrupts expression of floxed genes in PVD. Confocal fluorescence microscopic images of PVD soma in animals with the endogenously tagged gene loxP-UNC-116-GFP-loxP, without (left) or with (right) an integrated array (wyls897) expressing CRE in PVD lineage cells. punc-86::mCherry::PLCdeltaPH is expressed via an extrachromosomal array and labels PVD membrane.

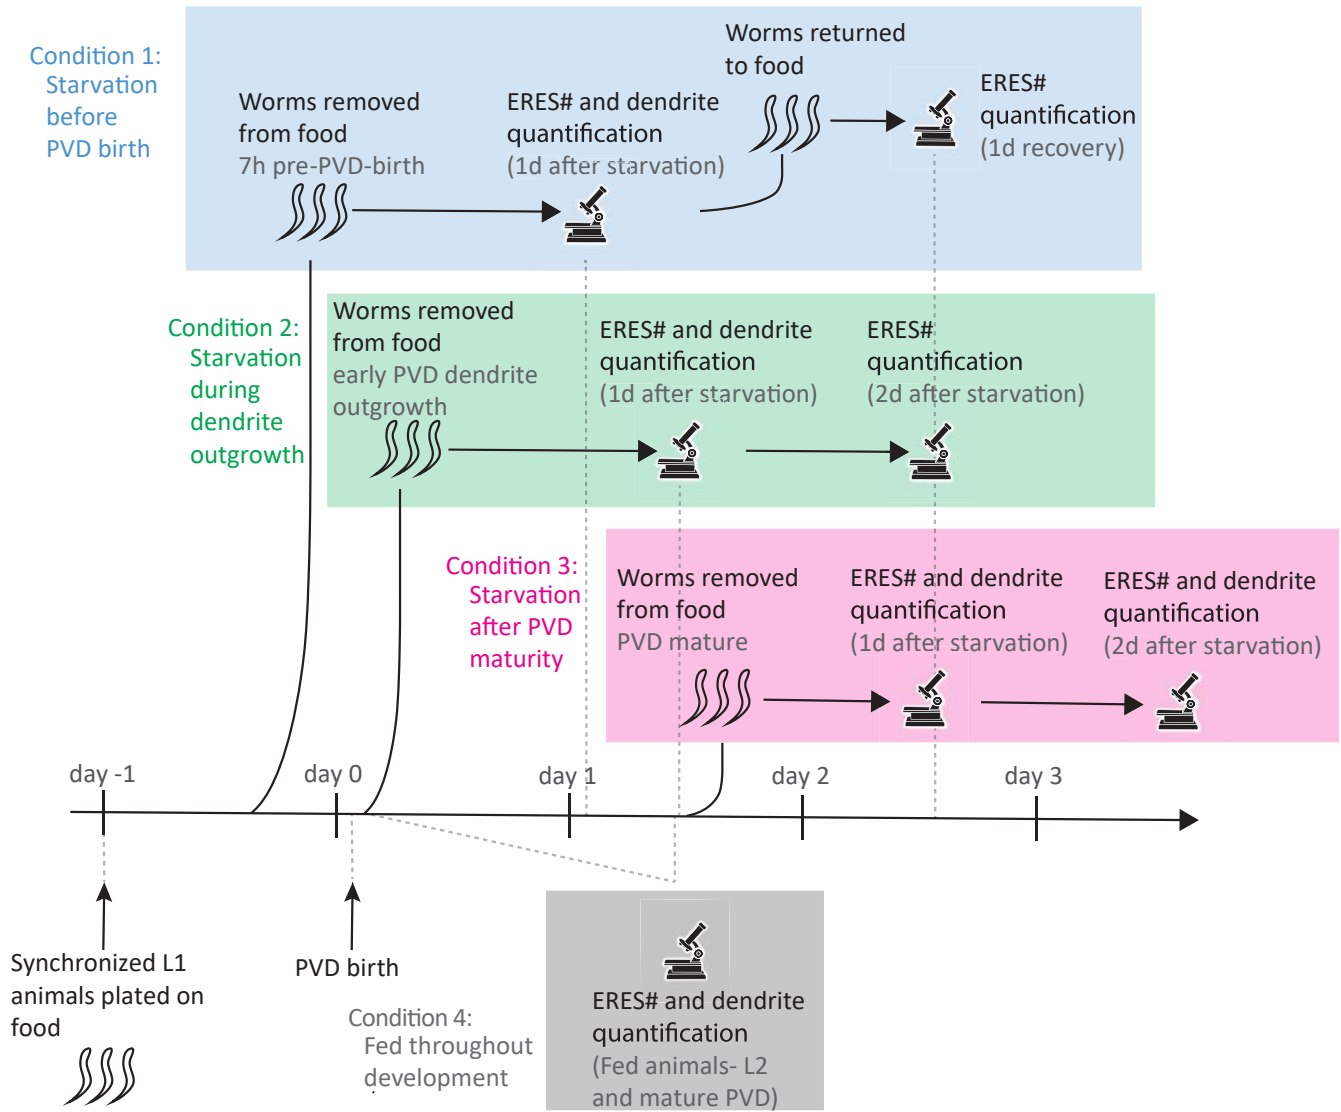

**Figure S3** (related to Fig. 6). Diagram of starvation timelines. A graphic illustration of the experimental procedure for the starvation experiments shown in Figure 6.

Table S1:

| Strain ID           | Genotype                                                                                                                                                               |
|---------------------|------------------------------------------------------------------------------------------------------------------------------------------------------------------------|
| TV27272             | <i>sec-16a.2(wy1524)</i> wyls900 X; wyls891 III; wyls581 IV                                                                                                            |
| TV28411             | wyEx10586; <i>sec-16a.2(wy1524)</i> X; wyls969 IV?                                                                                                                     |
| TV28412             | wyEx10587; <i>sec-16a.2(wy1524)</i> X; wyls969 IV?                                                                                                                     |
| TV27328             | <i>ahr-1(ju145)</i> I; <i>sec-16a.2(wy1524)</i> wyls900 X; wyls891 III; wyls581 IV                                                                                     |
| TV26984             | wyEx10309; wyEx9857; wyls592 III                                                                                                                                       |
| TV24562             | wyEx9857; wyls592 III                                                                                                                                                  |
| TV25633             | wyls901 wyls592 III; <i>rab-1(wy1375)</i> V/nT1 (IV; V)                                                                                                                |
| TV27727             | wyEx10429; wyls581 IV; <i>sec-16a.2(wy1524)</i> wyls900 X                                                                                                              |
| TV27728             | wyEx10429; <i>mec-3(e1338)</i> wyls581 IV; <i>sec-16a.2(wy1524)</i> wyls900 X                                                                                          |
| TV26084             | wyls50030                                                                                                                                                              |
| TV26063             | <i>hpo-30(ok2047)</i> ; wyls50030                                                                                                                                      |
| TV26064             | <i>kpc-1(gk8)</i> ; wyls50030                                                                                                                                          |
| TV26073             | <i>dma-1(tm5159)</i> ; wyls50030                                                                                                                                       |
| TV26068             | <i>unc-86(e1416)</i> ; wyls50030                                                                                                                                       |
| TV27747             | <i>sec-16a.2(wy1524)</i> wyls900 X; <i>lin-5(wy1576)</i> II; <i>zif-1(gk117)</i> III; wyls581 IV                                                                       |
| TV27812             | wyEx9744; <i>lin-5(wy1576)</i> II; <i>zif-1(gk117)</i> III; wyls969 (IV?); <i>sec-16a.2(wy1524)</i> wyls900 X                                                          |
| TV27272             | <i>sec-16a.2(wy1524)</i> /wyls900 X; wyls891 III; wyls581 IV                                                                                                           |
| TV27776             | <i>let-363(ok3018)/hT2</i> I; <i>sec-16a.2(wy1524)</i> wyls900 X; wyls891 III; wyls581 IV                                                                              |
| TV28329             | <i>let-363[floxed atg + first 8 exons](wy1706)</i> I; wyls901 wyls592 III                                                                                              |
| TV27845             | wyls897 X? <i>sec-16a.2(wy1524)</i> X; wyls969 IV? wyls581 IV                                                                                                          |
| TV28418             | wyls897 <i>sec-16a.2(wy1524)</i> X; <i>let-363[floxed atg + 8 exons](wy1706)</i> I; wyls969 wyls581 IV                                                                 |
| Strain ID:<br>92278 | Crossed from FR297 <sup>22</sup> . <i>rol-6(n1276e187)</i> ; swEx226 [ <i>rol-6(su1006)</i> <i>Plet-363/tor::gfp</i> ]; <i>sec-16a.2(wy1524)</i> wyls900 X; wyls581 IV |
| Strain ID:<br>92276 | <i>rol-6(n1276e187)</i> ; swEx226 [ <i>rol-6(su1006)</i> <i>Plet-363/tor::gfp</i> ]; <i>sec-16a.2(wy1524)</i> wyls900 X; wyls581 IV                                    |
| TV25173             | <i>unc-116(wy1311)</i> ; wyls897; wyEx9745                                                                                                                             |

| Mutant alleles                             | Notes                                                                                                                                   |
|--------------------------------------------|-----------------------------------------------------------------------------------------------------------------------------------------|
| <i>sec-16a.2(wy1524)</i> X                 | CRISPR inserted AID::GFP::N-terminal_FRTonCassette(FRTminimal::Degron::STOP::FRTminimal) fused at the 3' of endogenous <i>sec-16A.2</i> |
| <i>rab-1(wy1375 [loxP::rab-1::loxP])</i> V | loxP sites flanking <i>rab-1</i> , injected into N2                                                                                     |
| <i>ahr-1(ju145)</i> I                      | obtained from CGC                                                                                                                       |
| <i>sec-16a.2(wy1750)</i>                   | CRISPR removed AID from <i>sec-16a.2(wy1524)</i>                                                                                        |

|                                                   |                                                                                                                                                                                                         |
|---------------------------------------------------|---------------------------------------------------------------------------------------------------------------------------------------------------------------------------------------------------------|
| <i>[GFP::FRT::Degron::STOP::FRT::sec-16a.2] X</i> |                                                                                                                                                                                                         |
| <i>lin-5(wy1576) II</i>                           | <i>lin-5::ZF</i> knock in                                                                                                                                                                               |
| <i>let-363(ok3018)</i>                            | (ortholog of mTOR) arrests during larval development in L3-early L4. Obtained from CGC                                                                                                                  |
| <i>mec-3(e1338)</i>                               | obtained from CGC                                                                                                                                                                                       |
| <i>unc-86(e1416) III</i>                          | obtained from CGC                                                                                                                                                                                       |
| <i>hpo-30(ok2047)</i>                             |                                                                                                                                                                                                         |
| <i>kpc-1(gk8)</i>                                 |                                                                                                                                                                                                         |
| <i>dma-1(tm5159)</i>                              |                                                                                                                                                                                                         |
| <i>let-363(wy1706)</i>                            | CRISPR added loxp sites. First loxp site is just after the closest upstream gene at the beginning of the putative <i>let-363</i> promoter. The other loxP site is in the long intron after the 8th exon |
| <i>unc-116(wy1311)</i>                            | <i>loxP-unc-116-gfp-loxP</i> knock in worm. left loxP is inserted right before the start codon, right loxP was inserted to the 3'UTR region.                                                            |

| Integrated transgenes |                                                                                         |                                                                                                                                                                                                                  |
|-----------------------|-----------------------------------------------------------------------------------------|------------------------------------------------------------------------------------------------------------------------------------------------------------------------------------------------------------------|
| allele                | constructs for injection                                                                | notes                                                                                                                                                                                                            |
| wyls900 X             | <i>plin-32&gt;mCherry::PH(PLCδ)</i> (pJL188, 1ng/μl) + <i>punc-122&gt;RFP</i> (60ng/μl) | Integrand of wyEx9914 in ChrX                                                                                                                                                                                    |
| wyls891 III           | <i>Punc-86::FLP</i> (pDML63) 5ng/ul, 100 ng/ul <i>Podr-1::RFP</i>                       | Flippase (FLP) is used to excise FRT cassettes for cell-specific endogenous tagging of selected genes with XFP/tag                                                                                               |
| wyls581 IV            | <i>ser2prom3::myrmCherry::unc-54 3'UTR</i> (pOL036), with <i>Podr-1::GFP</i>            |                                                                                                                                                                                                                  |
| wyls969 IV?           | <i>plin-32::FLP</i> (@5ng/ul) with <i>podr-1::RFP</i> (@60ng/ul). >6x outcrossed        | Integrand of wyEx10429, probably on IV                                                                                                                                                                           |
| wyls592 III           | <i>ser2prom3::myr-GFP</i> (pOL020, 20ng/ul) + <i>Podr-1::RFP</i> .                      | Integrand of wyEx3355, on chromosome III                                                                                                                                                                         |
| iesi57 II             | [ <i>left-3p::TIR1::mRuby::unc-54 3'UTR + Cbr-unc-119(+)</i> ]                          | Single copy transgene inserted into chromosome II (oxTi179) expressing modified <i>Arabidopsis thaliana</i> TIR1 tagged with mRuby in the soma. This strain can be used for auxin-inducible degradation (AID) in |

|           |                                                                                        |                                                                                                                    |
|-----------|----------------------------------------------------------------------------------------|--------------------------------------------------------------------------------------------------------------------|
|           |                                                                                        | somatic tissues. Reference: Zhang L, et al. Development. 2015 Nov 9. pii: dev.129635.                              |
| wyls836   | Integrand of Pnhr-81::FLP (pDML60) 2.5ng/ul, 100 ng/ul Podr-1::RFP.                    | Flippase (FLP) is used to excise FRT cassettes for cell-specific endogenous tagging of selected genes with XFP/tag |
| wyls50030 | pPD95.77_ser-2Prom3::aman-2::GFP(2ng/ul) ser-2P3::mCherry(5ng/ul) Podr-1::GFP(50ng/ul) |                                                                                                                    |
| wyls901   | pnhr-81::cre + punc-122::rfp                                                           | Integrand of wyEx8881 on III                                                                                       |
| wyls897   | pnhr-81::cre + punc-122::rfp                                                           | integrand of wyEx8881, probably on X                                                                               |

| Extrachromosomal transgenes |                                                                                                                   |                                                                                                                    |
|-----------------------------|-------------------------------------------------------------------------------------------------------------------|--------------------------------------------------------------------------------------------------------------------|
| allele                      | Constructs                                                                                                        | notes                                                                                                              |
| wyEx10586                   | Pmec-17::mscarlet(plasmid KE51) (1ng/ul); Podr-1::GFP (40ng/ul)                                                   | expresses mscarlet in touch receptor neurons                                                                       |
| wyEx10429                   | plin-32::FLP (@5ng/ul) with podr-1::RFP (@60ng/ul)                                                                | Flippase (FLP) is used to excise FRT cassettes for cell-specific endogenous tagging of selected genes with XFP/tag |
| wyEx10587                   | FLP, PVD>mScarlet (Chris Tzeng plasmid @ 0.5 ng/uL); Punc-122::RFP (30ng/ul)                                      | This array labels PVD and FLP in red                                                                               |
| wyEx10309                   | Pser2prom3::sar-1-DN(dominant negative) (pCER218 @ 4ng/ul); Pmyo2::GFP @ 2ng/ul                                   |                                                                                                                    |
| wyEx9857                    | ser2prom3::sec-23::tagrfp, Pmyo-2::rfp.                                                                           |                                                                                                                    |
| wyEx9744                    | pMK41 (punc-86::mCherry::PLCdeltaPH) @ 2.5 ng/ul + pMK32 (punc-86::zif-1) @ 2.5 ng/ul + Podr-1::gfp @ 30 ng/ul    | expresses zif-1 in PVDmother (for degradation of lin-5)                                                            |
| wyEx10429                   | plin-32::FLP (@5ng/ul) with podr-1::RFP (@60ng/ul)                                                                | Flippase (FLP) is used to excise FRT cassettes for cell-specific endogenous tagging of selected genes with XFP/tag |
| swEx226                     | swEx226 = [rol-6(su1006) + let-363/tor::gfp]<br>Made by injecting 50 ug/ml pG70.3 and 200 g/ml pRF4 rol-6(su1006) | Originally from FR297 <sup>22</sup>                                                                                |
| wyEx9745                    | pMK41 (punc-86::mCherry::PLCdeltaPH) @ 5 ng/ul + Podr-1::gfp @ 30 ng/ul.                                          | Can see early PVD membrane in red                                                                                  |

|           |                                             |                  |
|-----------|---------------------------------------------|------------------|
| wyEx10220 | Pdes-2::AMAN-2::GFP with Podr-1::GFP.       | Labels PVD Golgi |
| wyEx9857  | Pser2prom3::sec-23::tagrfp with Pmyo-2::rfp | Labels PVD ERESs |
